# Supplementary figures and images for: MTHFD1L, A Folate Cycle Enzyme, Is Involved in Progression of Colorectal Cancer
Source: PubMed Central journal article supplement — Transl Oncol. 2019 Aug 14;12(11):1461–7. doi: 10.1016/j.tranon.2019.07.011 (PMC6704443; doi:10.1016/j.tranon.2019.07.011), 2019-08-14

# Supplementary Figure S1

## A

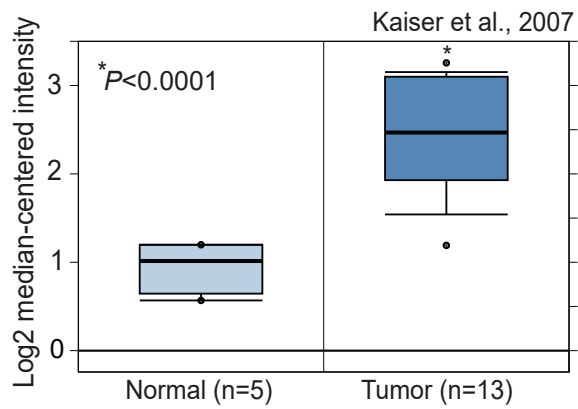

## B

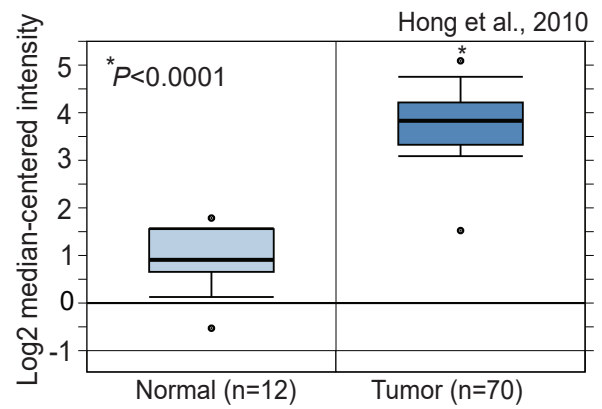

## C

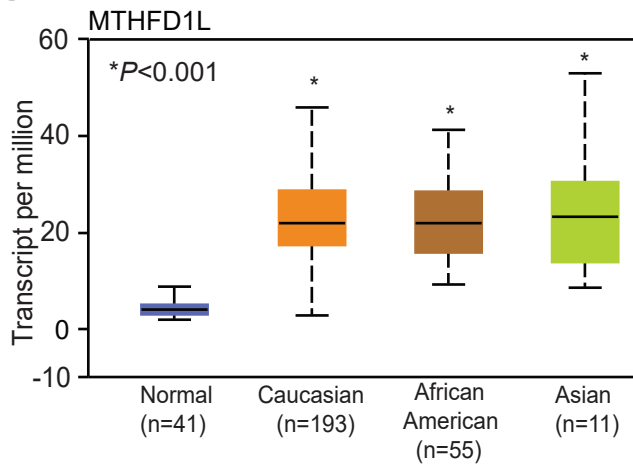

## D

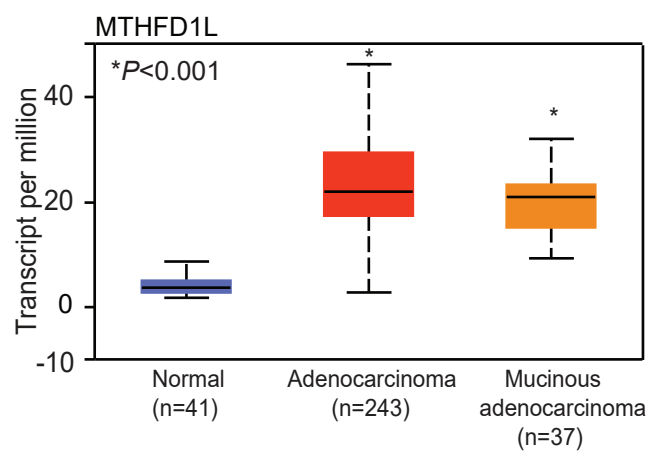

## E

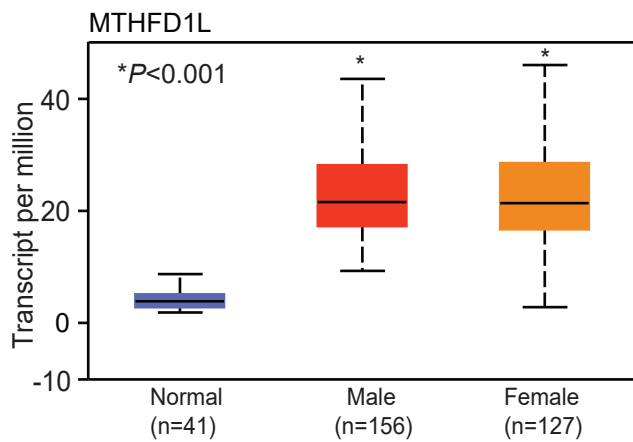

## F

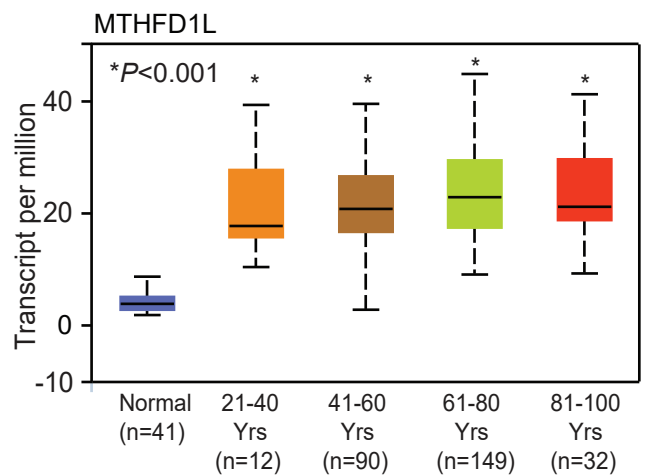

# Supplementary Figure S2

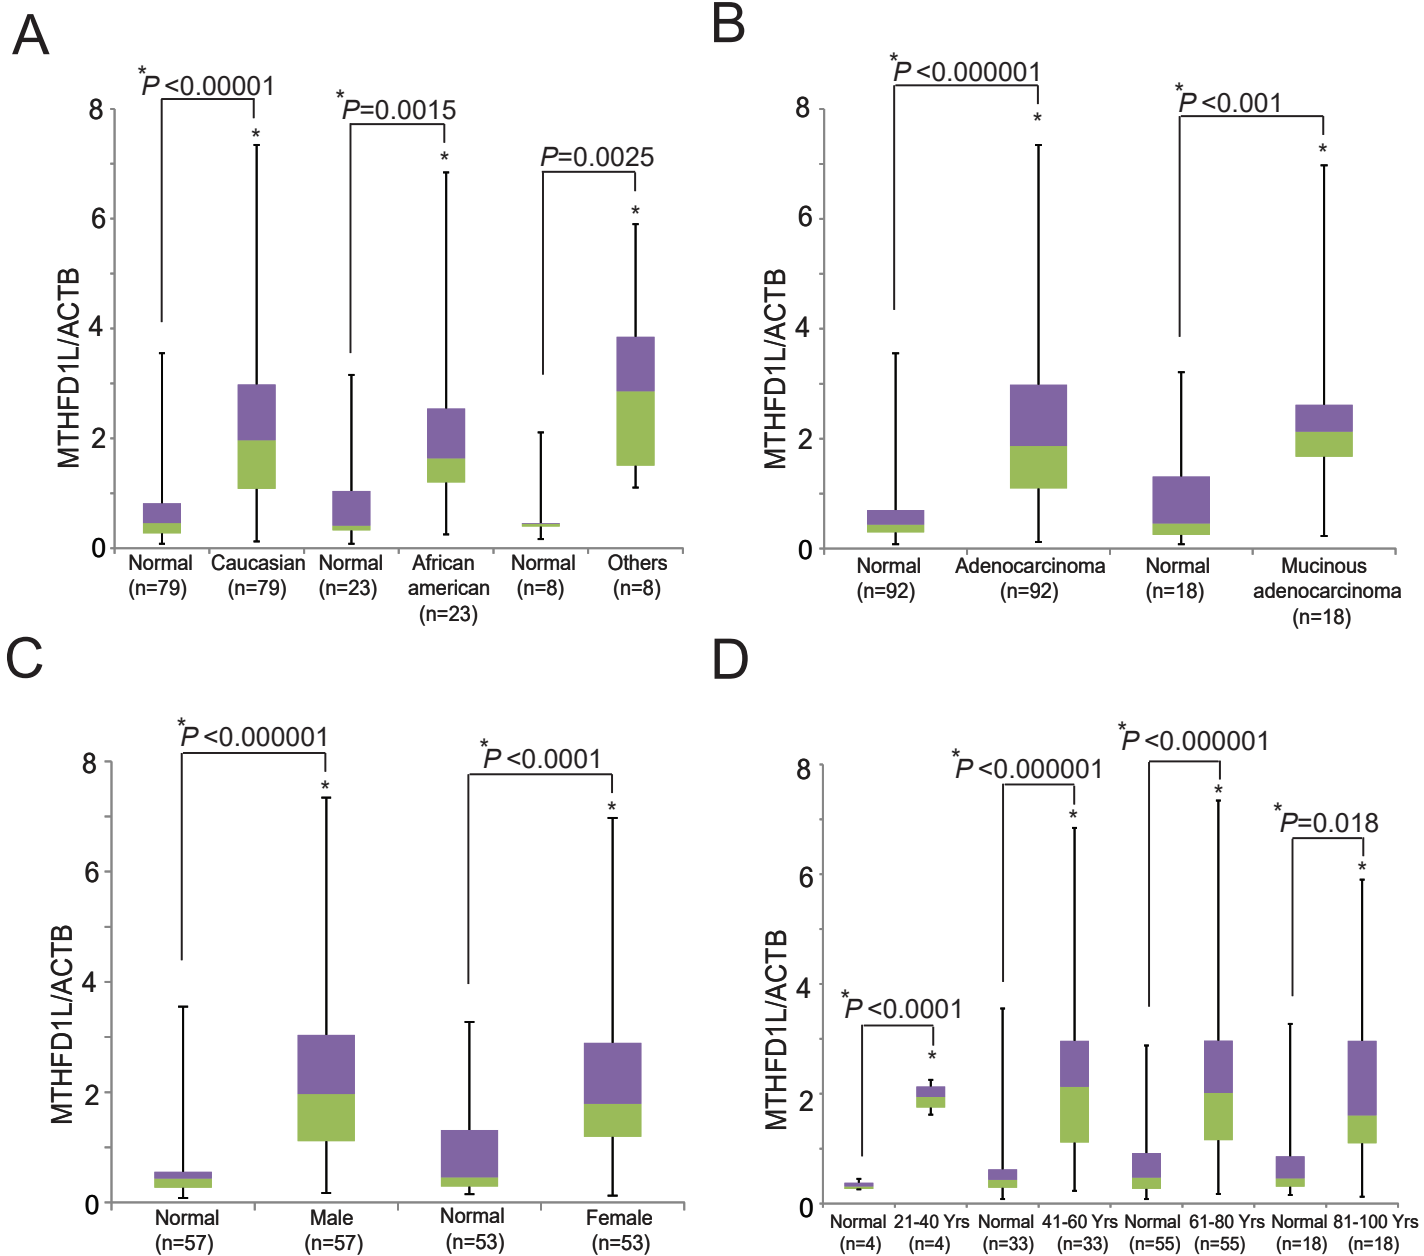

Supplement: mmc1.pdf [file mmc1.pdf]
